# Supplementary material for: Effects of single and double active sites of Cu oxide clusters over the MFI zeolite for direct conversion of methane to methanol: DFT calculations
Source: Royal Society of Chemistry journal article supplement (doi:10.1039/d0cp05435f), 2021-01-01
Supplement: d0cp05435f1.pdf [file d0cp05435f1.pdf]

## Supplementary Information

### Effects of single and double active sites of Cu oxide clusters over MFI zeolite for direct conversion of methane to methanol: DFT calculations

Watinee Nunthakitguson,<sup>a</sup> Anawat Thivasasith,<sup>\*a</sup> Thana Maihom,<sup>b</sup> and Chularat Wattanakit<sup>a</sup>

<sup>a</sup> Department of Chemical and Biomolecular Engineering, School of Energy Science and Engineering, Vidyasirimedhi Institute of Science and Technology, Rayong, 21210, Thailand.

<sup>b</sup> Department of Chemistry, Faculty of Liberal Arts and Science, Kasetsart University, Kamphaeng Saen Campus, Nakhon Pathom 73140, Thailand.

Corresponding Author's E-mail: anawat.t@vistec.ac.th

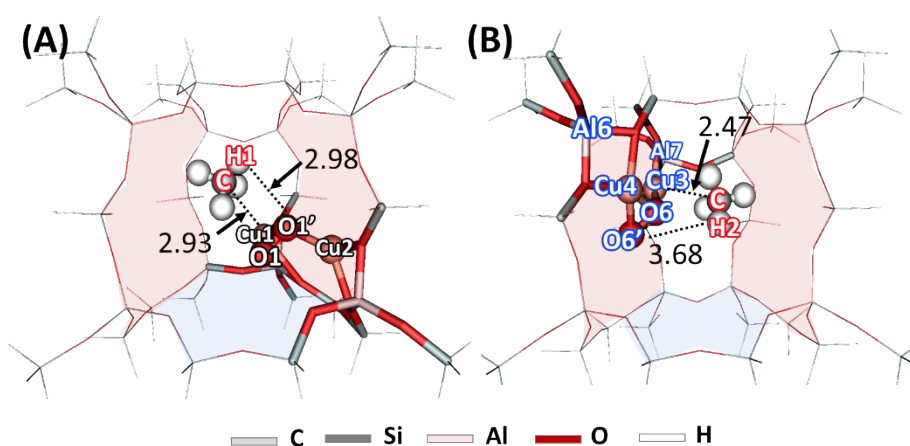

**Fig. S1.** Optimized structures of the adsorption state of methane on the single active site of A)  $[\text{Cu}(\mu\text{-}1,2\text{-peroxo})\text{Cu}]^{2+}@Al1'-Al12'/\text{MFI}$ , and B)  $[\text{Cu}(\mu\text{-}1,2\text{-peroxo})\text{Cu}]^{2+}@Al6-Al7/\text{MFI}$  calculated in the triplet spin ground state, and red and blue areas represent straight and zigzag channels, respectively (the unit of distance is in an angstrom).

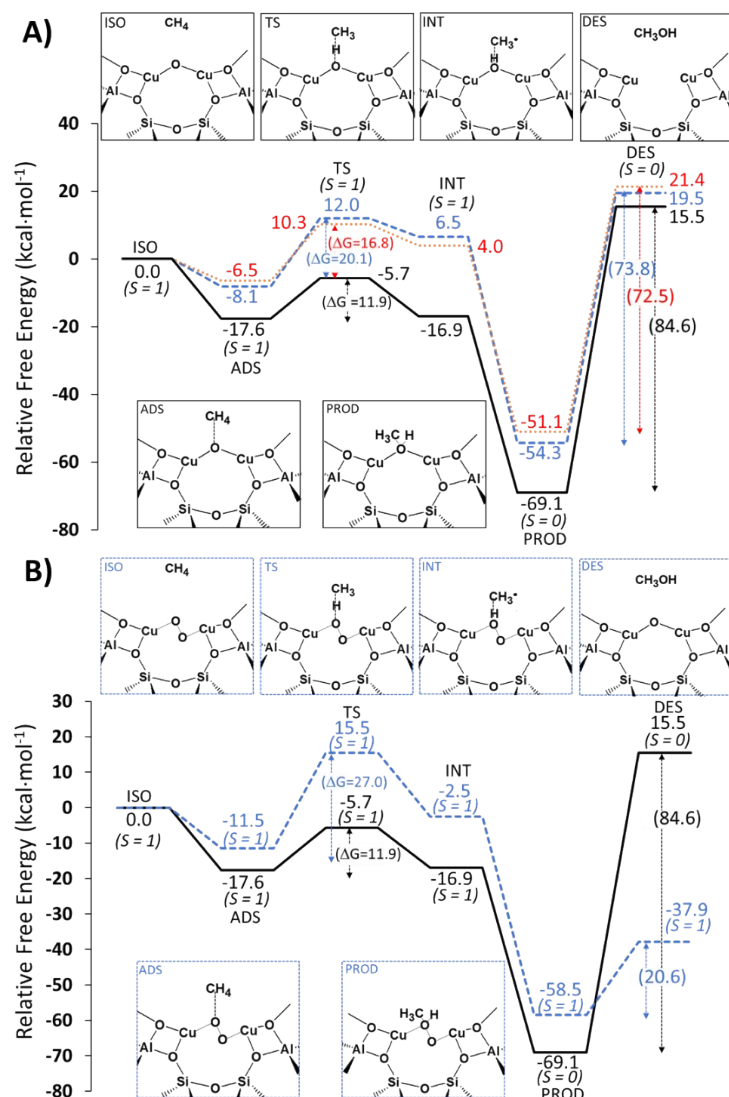

**Fig. S2** Free energy profile ( $\Delta G_{298.15}$ ) of overall steps of the direct conversion of methane to methanol on different Cu oxide clusters over MFI framework: A) comparison pathways of methane to methanol on single active site of  $[\text{Cu}(\mu\text{-O})\text{Cu}]^{2+}@Al1'-Al12'/\text{MFI}$  (blue dash line),  $[\text{Cu}(\mu\text{-O})\text{Cu}]^{2+}@Al6-Al7/\text{MFI}$  (red dot line), and on double active sites of  $2[\text{Cu}(\mu\text{-O})\text{Cu}]^{2+}/\text{MFI}$  (black line), B) comparison pathways of methane to methanol on  $2[\text{Cu}(\mu\text{-1,2-peroxo})\text{Cu}]^{2+}/\text{MFI}$  (blue dash line) and  $2[\text{Cu}(\mu\text{-O})\text{Cu}]^{2+}/\text{MFI}$  (black line).

### Structure details of single active site of $[\text{Cu}(\mu\text{-O})\text{Cu}]^{2+}@\text{Al1}'\text{-Al12}'/\text{MFI}$ and $[\text{Cu}(\mu\text{-O})\text{Cu}]^{2+}@\text{Al6-Al7}/\text{MFI}$ and double active sites $2[\text{Cu}(\mu\text{-O})\text{Cu}]^{2+}/\text{MFI}$ and $2[\text{Cu}(\mu\text{-1,2-peroxo})\text{Cu}]^{2+}/\text{MFI}$

The confinement effect of zeolite cavities has important stabilization effect to the bond length and bond angle of the Cu active site in zeolite. For the single active site of Cu oxide cluster located at the intersection between straight and zigzag channel of the MFI frameworks, the pore size of zeolite quite large compare with the small size of single active site of Cu oxide cluster, thus, the confinement effect of zeolite is not too much effect to the structure of the single active site of Cu oxide cluster. Therefore, the  $\text{Cu}\cdots\text{O}_{\text{oxo}}$  bond length of single active sites of  $[\text{Cu}(\mu\text{-O})\text{Cu}]^{2+}@\text{Al1}'\text{-Al12}'/\text{MFI}$  and  $[\text{Cu}(\mu\text{-O})\text{Cu}]^{2+}@\text{Al6-Al7}/\text{MFI}$  are approximately 1.89 Å. The bond angles of  $\angle\text{Cu1O1Cu2}$  of  $[\text{Cu}(\mu\text{-O})\text{Cu}]^{2+}@\text{Al1}'\text{-Al12}'/\text{MFI}$  and  $\angle\text{Cu3O6Cu4}$  of  $[\text{Cu}(\mu\text{-O})\text{Cu}]^{2+}@\text{Al6-Al7}/\text{MFI}$  are in the range of 150 and 156 °, respectively (Tables S1 and S2). While the double active site of Cu oxide cluster in zeolite framework, the confinement effect of zeolite is effect to the bond length and bond angle of double active site of Cu oxide cluster. For the double active sites of  $2[\text{Cu}(\mu\text{-O})\text{Cu}]^{2+}/\text{MFI}$ , the average  $\text{Cu}\cdots\text{O}_{\text{oxo}}$  bond length is shortened from 1.89 to 1.77 Å and the bond angle of  $\angle\text{CuO}_{\text{oxo}}\text{Cu}$  is narrowing from the range of 150-156° to 142-143° compared with the single active site model (Table S3). For the  $2[\text{Cu}(\mu\text{-1,2-peroxo})\text{Cu}]^{2+}/\text{MFI}$  exhibit the same trend with  $2[\text{Cu}(\mu\text{-O})\text{Cu}]^{2+}/\text{MFI}$ , the  $\text{Cu}\cdots\text{O}_{\text{peroxo}}$  bond length is shortened from the range of 1.98-2.04 to 1.96-2.03 Å, and the average  $\text{O}_{\text{peroxo}}\cdots\text{O}_{\text{peroxo}}$  bond length is shortened from 1.32 to 1.31 Å compared with the single active site model of  $[\text{Cu}(\mu\text{-1,2-peroxo})\text{Cu}]^{2+}/\text{MFI}$  (Table S4).

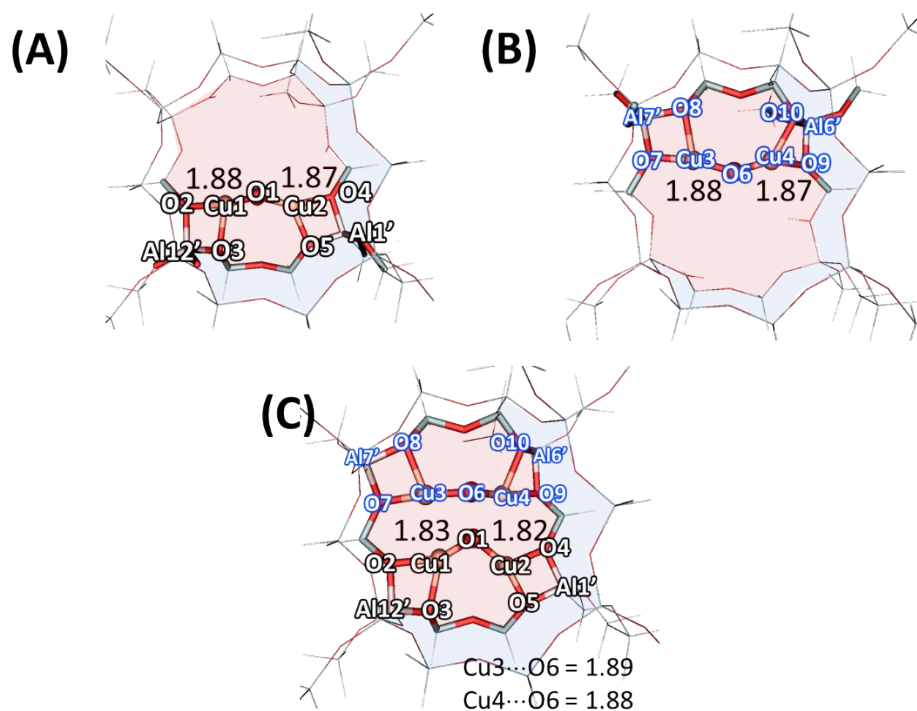

**Fig. S3** Optimized structures for the single active sites of A)  $[\text{Cu}(\mu\text{-O})\text{Cu}]^{2+}@ \text{Al1}'\text{-Al12}'/\text{MFI}$ , B)  $[\text{Cu}(\mu\text{-O})\text{Cu}]^{2+}@ \text{Al6}'\text{-Al7}'/\text{MFI}$ , and the double active sites of C)  $2[\text{Cu}(\mu\text{-O})\text{Cu}]^{2+}/\text{MFI}$  calculated in the triplet spin ground state (Red and blue areas represent straight and zigzag channels, respectively, and the illustrated distance are in angstrom unit).

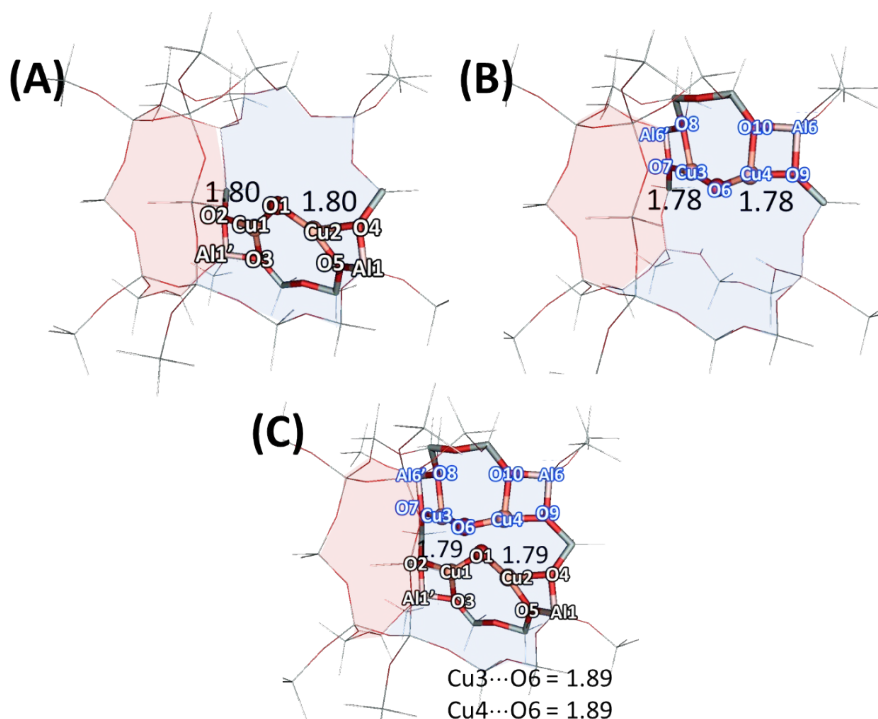

**Fig. S4** Optimized structures for the single active sites of A)  $[\text{Cu}(\mu\text{-O})\text{Cu}]^{2+}@ \text{Al1}\text{-Al1}'/\text{MFI}$ , B)  $[\text{Cu}(\mu\text{-O})\text{Cu}]^{2+}@ \text{Al6}\text{-Al6}'/\text{MFI}$ , and the double active sites of C)  $2[\text{Cu}(\mu\text{-O})\text{Cu}]^{2+}/\text{MFI}$  calculated in the triplet spin ground state (Red and blue areas represent straight and zigzag channels, respectively, and the illustrated distance are in angstrom unit).

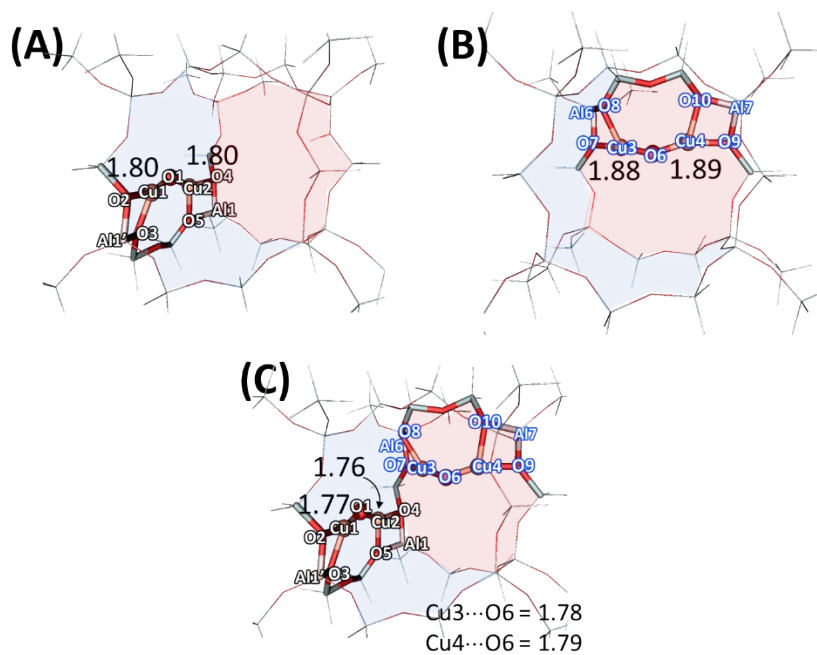

**Fig. S5** Optimized structures for the single active sites of A)  $[\text{Cu}(\mu\text{-O})\text{Cu}]^{2+}$ @ Al1-Al1'/MFI, B)  $[\text{Cu}(\mu\text{-O})\text{Cu}]^{2+}$ @ Al6-Al7/MFI, and the double active sites of C)  $2[\text{Cu}(\mu\text{-O})\text{Cu}]^{2+}$ /MFI calculated in the triplet spin ground state (Red and blue areas represent straight and zigzag channels, respectively, and the illustrated distance are in angstrom unit).

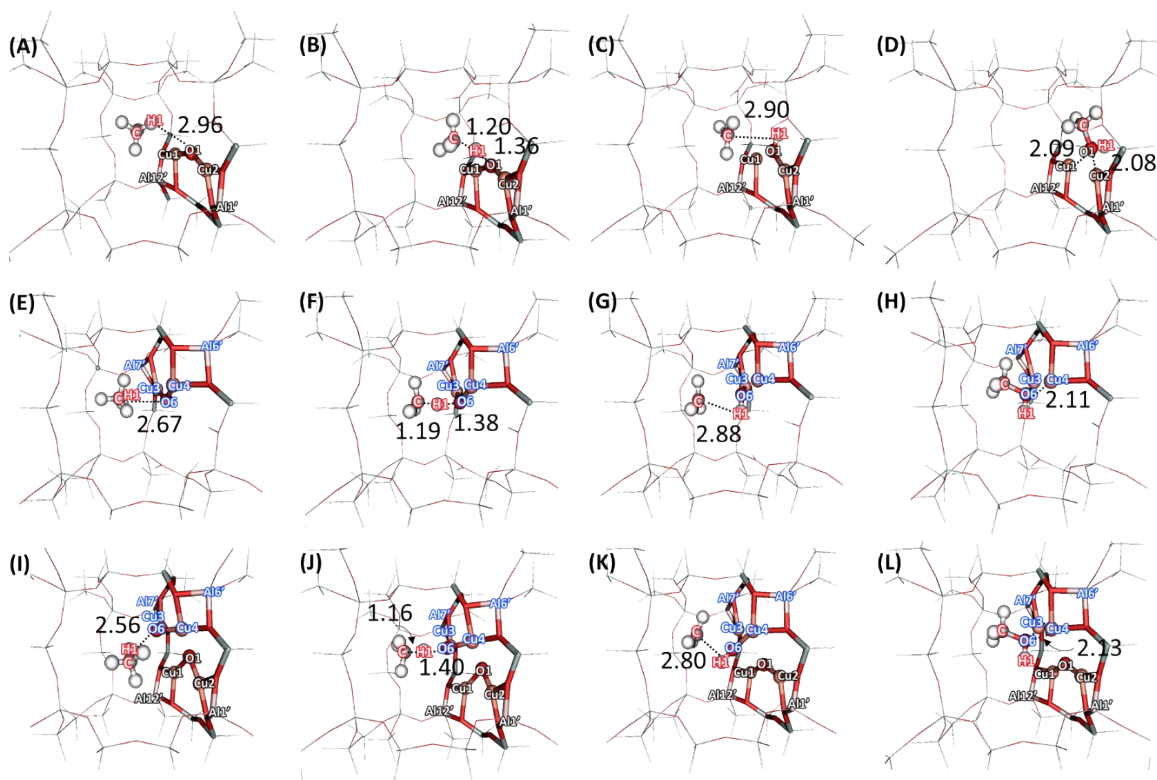

**Fig. S6** Optimized structures of the overall steps of the direct conversion of methane to methanol on the single active sites of A-D)  $[\text{Cu}(\mu\text{-O})\text{Cu}]^{2+}@\text{Al}1'\text{-Al}12'/\text{MFI}$ , E-H)  $[\text{Cu}(\mu\text{-O})\text{Cu}]^{2+}@ \text{Al}6'\text{-Al}7' /\text{MFI}$ , and the double active sites of I-L) the double active sites of C)  $2[\text{Cu}(\mu\text{-O})\text{Cu}]^{2+}/\text{MFI}$

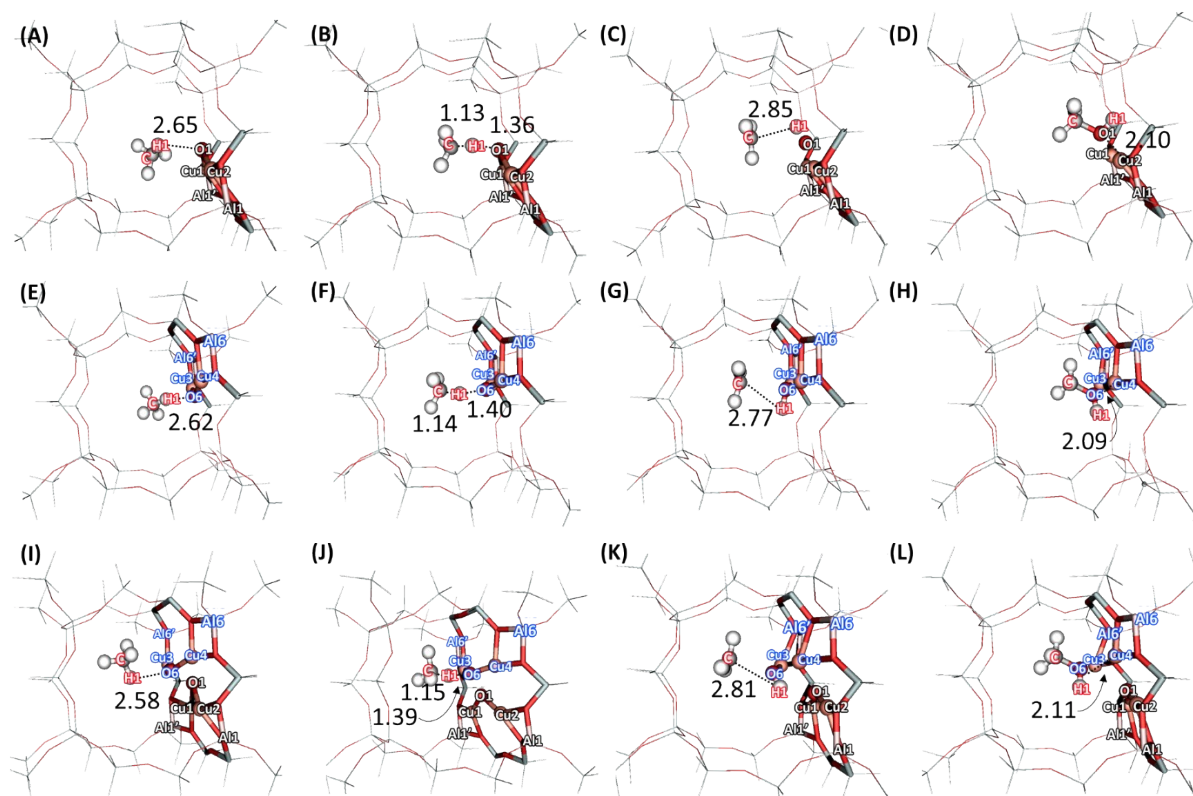

**Fig. S7** Optimized structures of the overall steps of the direct conversion of methane to methanol on the single active sites of A-D)  $[\text{Cu}(\mu\text{-O})\text{Cu}]^{2+}$ @ Al1-Al1'/MFI, B), E-H)  $[\text{Cu}(\mu\text{-O})\text{Cu}]^{2+}$ @ Al6-Al6'/MFI, and the double active sites of I-L) the double active sites of C)  $2[\text{Cu}(\mu\text{-O})\text{Cu}]^{2+}/\text{MFI}$

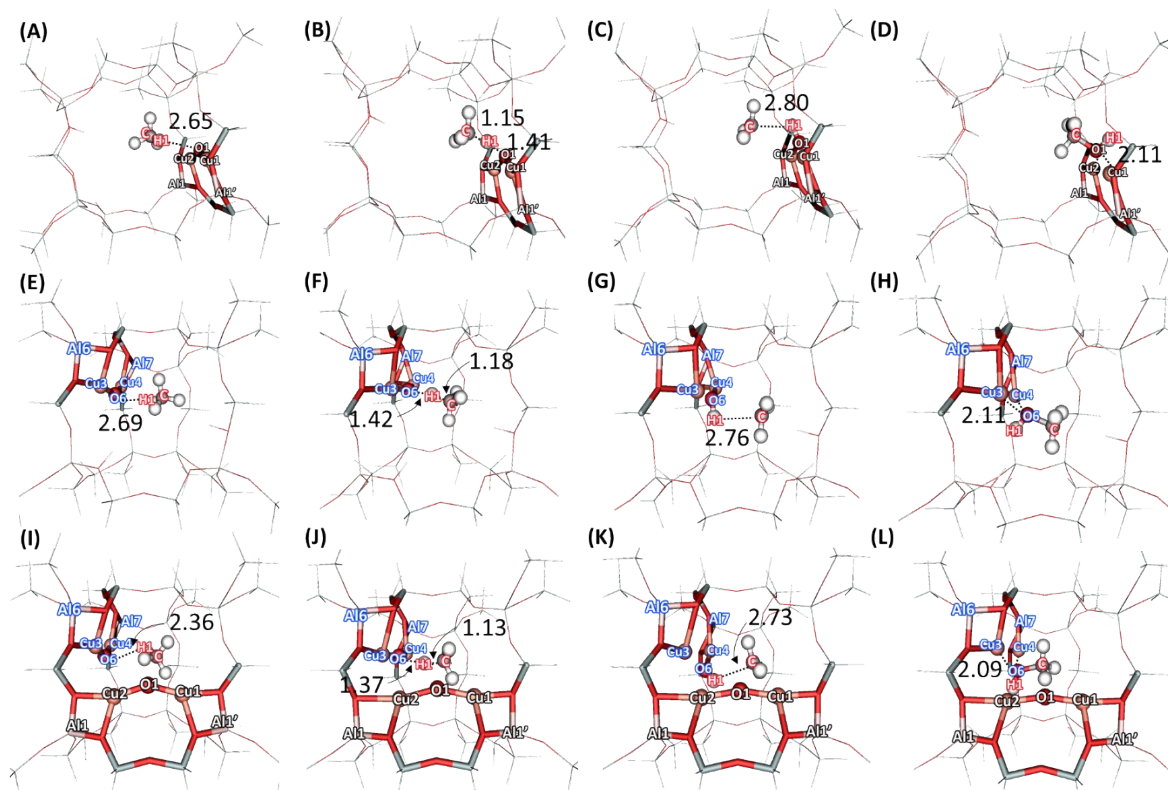

**Fig. S8** Optimized structures Optimized structures of the overall steps of the direct conversion of methane to methanol on the single active sites of A-D)  $[\text{Cu}(\mu\text{-O})\text{Cu}]^{2+}$ @ Al1-Al1'/MFI, E-H)  $[\text{Cu}(\mu\text{-O})\text{Cu}]^{2+}$ @ Al6- Al7/MFI, and the double active sites of I-L) the double active sites of C)  $2[\text{Cu}(\mu\text{-O})\text{Cu}]^{2+}$ /MFI



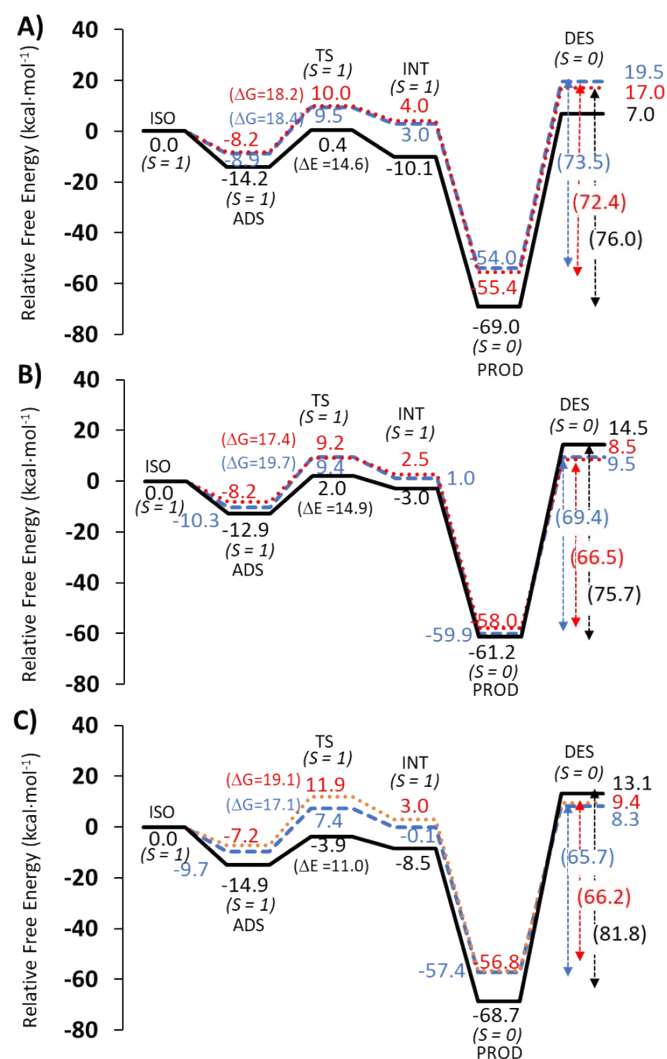

**Fig. S9** Free energy profile ( $\Delta G_{298.15}$ ) of overall steps of the direct conversion of methane to methanol on different Cu oxide clusters over MFI framework: A) comparison pathways of methane to methanol on single active site of  $[\text{Cu}(\mu\text{-O})\text{Cu}]_2+\text{@Al1}'\text{-Al12}'/\text{MFI}$  (blue dash line),  $[\text{Cu}(\mu\text{-O})\text{Cu}]_2+\text{@Al6}'\text{-Al7}'/\text{MFI}$  (red dot line), and on double active sites of  $2[\text{Cu}(\mu\text{-O})\text{Cu}]_2+/\text{MFI}$  (black line), B) comparison pathways on single active site of  $[\text{Cu}(\mu\text{-O})\text{Cu}]_2+\text{@Al1}\text{-Al1}'/\text{MFI}$  (blue dash line),  $[\text{Cu}(\mu\text{-O})\text{Cu}]_2+\text{@Al6}\text{-Al6}'/\text{MFI}$  (red dot line), and on double active sites of  $2[\text{Cu}(\mu\text{-O})\text{Cu}]_2+/\text{MFI}$  (black line), and C) comparison pathways on single active site of  $[\text{Cu}(\mu\text{-O})\text{Cu}]_2+\text{@Al1}\text{-Al1}'/\text{MFI}$  (blue dash line),  $[\text{Cu}(\mu\text{-O})\text{Cu}]_2+\text{@Al6}\text{-Al7}/\text{MFI}$  (red dot line), and on double active sites of  $2[\text{Cu}(\mu\text{-O})\text{Cu}]_2+/\text{MFI}$  (black line)

**Table S1** Optimized geometrical parameters of the single active site of [Cu( $\mu$ -O)Cu]<sup>2+</sup>@Al1'-Al12'/MFI

| Parameters          | ISO   | ADS   | TS1   | INT   | PROD  |
|---------------------|-------|-------|-------|-------|-------|
| <i>Distance (Å)</i> |       |       |       |       |       |
| Cu1-O1              | 1.89  | 1.79  | 1.86  | 1.97  | 2.23  |
| Cu1-O2              | 1.86  | 1.98  | 1.88  | 2.24  | 2.03  |
| Cu1-O3              | 1.95  | 2.02  | 1.97  | 2.07  | 2.12  |
| Cu1-Al12'           | 2.69  | 2.74  | 2.69  | 2.79  | 2.73  |
| Cu2-O1              | 1.88  | 1.77  | 1.86  | 1.80  | 1.99  |
| Cu2-O4              | 1.85  | 1.95  | 1.86  | 1.93  | 1.96  |
| Cu2-O5              | 1.97  | 2.03  | 2.00  | 2.00  | 1.88  |
| Cu2-Al1'            | 2.72  | 2.77  | 2.72  | 2.74  | 2.70  |
| C-Cu1               | -     | 2.87  | 2.88  | 3.88  | 3.01  |
| C-O1                | -     | 3.68  | 2.59  | 3.11  | 1.50  |
| C-H1                | 1.09  | 1.10  | 1.39  | 2.66  | 2.02  |
| H1-O1               | -     | 3.14  | 1.26  | 0.99  | 0.97  |
| C-Cu2               | -     | 4.68  | 3.86  | 3.90  | 2.98  |
| <i>Angle (°)</i>    |       |       |       |       |       |
| Cu1-O1-Cu2          | 150.4 | 144.7 | 148.8 | 106.4 | 102.6 |

**Table S2** Optimized geometrical parameters of the single active site of [Cu( $\mu$ -O)Cu]<sup>2+</sup>@Al6-Al7/MFI

| Parameters           | ISO   | ADS   | TS1   | INT   | PROD  |
|----------------------|-------|-------|-------|-------|-------|
| <i>Distances (Å)</i> |       |       |       |       |       |
| Cu3-O6               | 1.90  | 1.78  | 1.93  | 1.78  | 2.11  |
| Cu3-O7               | 1.87  | 1.95  | 2.22  | 1.96  | 2.08  |
| Cu3-O8               | 1.98  | 2.08  | 2.02  | 1.97  | 2.09  |
| Cu3-Al7              | 2.70  | 2.79  | 2.83  | 2.77  | 2.81  |
| Cu4-O6               | 1.89  | 1.76  | 1.81  | 2.05  | 2.11  |
| Cu4-O9               | 1.90  | 1.96  | 1.94  | 2.17  | 2.09  |
| Cu4-O10              | 1.96  | 2.07  | 2.00  | 2.13  | 2.12  |
| Cu4-Al6              | 2.65  | 2.65  | 2.66  | 2.73  | 2.73  |
| C-Cu3                | -     | 2.84  | 3.43  | 3.61  | 2.89  |
| C-O6                 | -     | 3.06  | 2.58  | 2.70  | 1.46  |
| C-H2                 | 1.09  | 1.10  | 1.18  | 2.10  | 1.99  |
| H2-O6                | -     | 2.74  | 1.42  | 1.00  | 0.97  |
| C-Cu4                | -     | 4.42  | 3.83  | 3.05  | 3.06  |
| <i>Angle (°)</i>     |       |       |       |       |       |
| Cu3-O6-Cu4           | 155.9 | 147.3 | 136.4 | 113.4 | 102.9 |

**Table S3** Optimized geometrical parameters for the double active sites of  $2[\text{Cu}(\mu\text{-O})\text{Cu}]^{2+}/\text{MFI}$ 

| Parameters          | ISO   | ADS   | TS1   | INT   | PROD  |
|---------------------|-------|-------|-------|-------|-------|
| <i>Distance (Å)</i> |       |       |       |       |       |
| Cu1-O1              | 1.77  | 1.78  | 1.85  | 1.99  | 2.09  |
| Cu1-O2              | 2.00  | 1.98  | 2.00  | 2.07  | 2.14  |
| Cu1-O3              | 2.01  | 2.02  | 2.06  | 2.16  | 2.08  |
| Cu1-Al6             | 2.72  | 2.74  | 2.73  | 2.77  | 2.74  |
| Cu2-O1              | 1.77  | 1.77  | 1.87  | 1.81  | 2.10  |
| Cu2-O4              | 1.95  | 1.94  | 1.97  | 1.89  | 2.10  |
| Cu2-O5              | 2.02  | 2.02  | 2.09  | 1.99  | 2.08  |
| Cu-Al7              | 2.76  | 2.78  | 2.78  | 2.73  | 2.78  |
| Cu3-O6              | 1.77  | 1.88  | 1.78  | 1.78  | 1.79  |
| Cu3-O7              | 1.96  | 1.98  | 1.96  | 1.95  | 1.96  |
| Cu3-O8              | 2.05  | 2.09  | 2.05  | 2.04  | 2.04  |
| Cu3-Al7             | 2.77  | 2.78  | 2.78  | 2.77  | 2.77  |
| Cu4-O6              | 1.78  | 1.86  | 1.78  | 1.77  | 1.79  |
| Cu4-O9              | 1.96  | 1.96  | 1.96  | 1.95  | 1.96  |
| Cu4-O10             | 2.05  | 2.11  | 2.05  | 2.05  | 2.05  |
| Cu4-Al6             | 2.66  | 2.68  | 2.66  | 2.66  | 2.67  |
| C-Cu1               | -     | 2.85  | 3.16  | 3.21  | 2.95  |
| C-O1                | -     | 3.47  | 2.59  | 2.81  | 1.47  |
| C-H1                | 1.09  | 1.10  | 1.18  | 1.88  | 2.00  |
| H1-O1               | -     | 2.73  | 1.43  | 0.99  | 0.97  |
| C-Cu3               | -     | 2.90  | 3.89  | 3.57  | 3.95  |
| C-O6                | -     | 3.02  | 3.13  | 2.87  | 3.06  |
| C-H2                | 1.09  | 1.10  | 1.09  | 1.08  | 1.09  |
| H2-O6               | -     | 2.62  | 2.56  | 3.22  | 3.40  |
| <i>Angle (°)</i>    |       |       |       |       |       |
| Cu1-O1-Cu2          | 141.5 | 143.7 | 131.5 | 129.5 | 95.3  |
| Cu3-O6-Cu4          | 142.6 | 134.2 | 142.1 | 141.9 | 138.2 |

**Table S4** Optimized geometrical parameters for the double active sites of 2[Cu( $\mu$ -1,2-peroxo)Cu]<sup>2+</sup>/MFI

| Parameters          | ISO <sup>a</sup> | ISO  | ADS  | TS1  | INT  | PROD |
|---------------------|------------------|------|------|------|------|------|
| <i>Distance (Å)</i> |                  |      |      |      |      |      |
| Cu1-O1              | -                | 1.95 | 2.07 | 2.00 | 2.08 | 1.99 |
| Cu1-O1'             | -                | 2.87 | 2.87 | 2.81 | 2.94 | 2.84 |
| O1-O1'              | -                | 1.31 | 1.30 | 1.30 | 1.30 | 1.30 |
| Cu1-O2              | -                | 1.93 | 2.06 | 2.01 | 2.04 | 2.01 |
| Cu1-O3              | -                | 2.78 | 2.15 | 2.17 | 2.23 | 2.20 |
| Cu1-Al12'           | -                | 2.78 | 2.77 | 2.76 | 2.76 | 2.78 |
| Cu2-O1              | -                | 1.95 | 1.96 | 1.96 | 1.97 | 1.95 |
| Cu2-O1'             | -                | 1.97 | 1.98 | 1.99 | 1.98 | 1.97 |
| Cu2-O4              | -                | 1.91 | 1.97 | 1.92 | 1.93 | 1.91 |
| Cu2-O5              | -                | 1.96 | 1.93 | 1.98 | 2.00 | 1.96 |
| Cu2-Al1'            | -                | 2.66 | 2.75 | 2.74 | 2.76 | 2.74 |
| Cu3-O6              | 2.04             | 2.03 | 2.04 | 2.03 | 2.02 | 1.92 |
| Cu3-O6'             | 2.84             | 2.85 | 2.91 | 2.92 | 2.83 | 3.64 |
| O6-O6'              | 1.32             | 1.30 | 1.31 | 1.40 | 1.45 | 2.64 |
| Cu3-O7              | 2.02             | 2.02 | 2.02 | 2.05 | 2.04 | 2.06 |
| Cu3-O8              | 2.18             | 2.19 | 2.22 | 2.23 | 2.22 | 2.19 |
| Cu3-Al7             | 2.74             | 2.76 | 2.77 | 2.81 | 2.82 | 2.78 |
| Cu4-O6              | 1.98             | 1.97 | 1.94 | 1.90 | 1.91 | 1.90 |
| Cu4-O6'             | 1.99             | 2.00 | 1.98 | 2.07 | 2.02 | 1.97 |
| Cu4-O9              | 1.96             | 1.95 | 1.93 | 1.96 | 1.93 | 2.02 |
| Cu4-O10             | 1.97             | 1.97 | 1.97 | 1.97 | 1.99 | 1.99 |
| Cu4-Al6             | 2.67             | 2.68 | 2.66 | 2.71 | 2.67 | 2.74 |
| C-Cu1               | -                | -    | 2.66 | 3.46 | 2.31 | 5.20 |
| C-O1                | -                | -    | 3.65 | 3.60 | 3.15 | 5.90 |
| C-O1'               | -                | -    | 3.45 | 3.61 | 3.60 | 6.03 |
| C-H1                | -                | -    | 1.10 | 1.09 | 1.09 | 1.09 |
| H1-O1'              | -                | -    | 2.69 | 4.05 | 3.63 | 5.94 |
| C-Cu3               | -                | -    | 2.95 | 4.47 | 4.47 | 3.83 |
| C-O6                | -                | -    | 2.95 | 3.06 | 3.44 | 2.92 |
| C-O6'               | -                | -    | 3.68 | 2.53 | 3.06 | 1.44 |
| C-H2                | 1.09             | 1.09 | 1.10 | 1.35 | 3.53 | 2.01 |
| H2-O6               | -                | -    | 2.67 | 2.06 | 1.95 | 3.57 |
| H2-O6'              | -                | -    | 3.54 | 1.20 | 0.97 | 0.97 |
| <i>Angle (°)</i>    |                  |      |      |      |      |      |

|             |       |       |       |       |       |       |
|-------------|-------|-------|-------|-------|-------|-------|
| Cu1-O1'-Cu2 | -     | 103.0 | 92.6  | 94.4  | 89.5  | 95.6  |
| Cu1-O1-Cu2  | -     | 157.1 | 124.3 | 128.9 | 120.9 | 133.5 |
| Cu3-O6'-Cu4 | 96.8  | 96.7  | 95.6  | 89.2  | 89.9  | 66.7  |
| Cu3-O6-Cu4  | 131.5 | 131.5 | 134.4 | 129.5 | 124.6 | 125.3 |

<sup>a</sup> Optimized geometrical parameters for the single active sites of  $[\text{Cu}(\mu\text{-}1,2\text{-peroxo})\text{Cu}]^{2+}/\text{MFI}$

**Table S5** Summarized Mulliken Charges of various Cu oxide cluster on Al1'-Al12' and Al6-Al7 pair in MFI framework through direct methane to methanol process.

| Active sites                                                                  | Fragment | ISO   | ADS   | TS    | INT   | PROD  |
|-------------------------------------------------------------------------------|----------|-------|-------|-------|-------|-------|
| $[\text{Cu}(\mu\text{-O})\text{Cu}]^{2+}/\text{Al1}'\text{-Al12}'/\text{MFI}$ | Cu1      | 0.68  | 0.55  | 0.39  | 0.50  | 0.33  |
|                                                                               | Cu2      | 0.75  | 0.72  | 0.76  | 0.77  | 0.49  |
|                                                                               | O1       | -0.83 | -0.82 | -0.69 | -0.87 | -0.60 |
|                                                                               | Spin     | 1     | 1     | 1     | 1     | 0     |
| $[\text{Cu}(\mu\text{-O})\text{Cu}]^{2+}/\text{Al6-Al7}/\text{MFI}$           | Cu3      | 0.69  | 0.67  | 0.72  | 0.71  | 0.68  |
|                                                                               | Cu4      | 0.65  | 0.57  | 0.25  | 0.45  | 0.33  |
|                                                                               | O6       | -0.81 | -0.81 | -0.72 | -0.87 | -0.69 |
|                                                                               | Spin     | 1     | 1     | 1     | 1     | 0     |
| $2[\text{Cu}(\mu\text{-O})\text{Cu}]^{2+}/\text{MFI}$                         | Cu1      | 0.71  | 0.55  | 0.46  | 0.47  | 0.45  |
|                                                                               | Cu2      | 0.61  | 0.72  | 0.49  | 0.49  | 0.41  |
|                                                                               | O1       | -0.80 | -0.82 | -0.79 | -0.82 | -0.77 |
|                                                                               | Cu3      | 0.52  | 0.55  | 0.70  | 0.72  | 0.68  |
|                                                                               | Cu4      | 0.60  | 0.42  | 0.61  | 0.63  | 0.57  |
|                                                                               | O6       | -0.56 | -0.46 | -0.81 | -0.82 | -0.77 |
| $2[\text{Cu}(\mu\text{-}1,2\text{-peroxo})\text{Cu}]^{2+}/\text{MFI}$         | Spin     | 1     | 1     | 1     | 1     | 0     |
|                                                                               | Cu3      | 0.26  | 0.21  | 0.24  | 0.29  | 0.25  |
|                                                                               | Cu4      | 0.69  | 0.73  | 0.73  | 0.75  | 0.70  |
|                                                                               | O6       | -0.09 | -0.12 | -0.26 | -0.33 | -0.31 |
|                                                                               | O6'      | -0.26 | -0.29 | -0.43 | -0.48 | -0.41 |
|                                                                               | Cu1      | 0.79  | 0.68  | 0.63  | 0.70  | 0.66  |
|                                                                               | Cu2      | 0.28  | 0.20  | 0.25  | 0.33  | 0.27  |
|                                                                               | O1       | -0.13 | -0.11 | -0.10 | -0.15 | -0.13 |
| O1'                                                                           | -0.30    | -0.25 | -0.27 | -0.31 | -0.28 |       |
| Spin                                                                          | 1        | 1     | 1     | 1     | 1     |       |

**Table S6** Summarized Mulliken Charges of various Cu oxide cluster on Al1'-Al12' and Al6'-Al7' pair in MFI framework through direct methane to methanol process.

| Active sites                                                                  | Fragment | ISO   | ADS   | TS    | INT   | PROD  |
|-------------------------------------------------------------------------------|----------|-------|-------|-------|-------|-------|
| $[\text{Cu}(\mu\text{-O})\text{Cu}]^{2+}/\text{Al1}'\text{-Al12}'/\text{MFI}$ | Cu1      | 0.70  | 0.55  | 0.39  | 0.51  | 0.34  |
|                                                                               | Cu2      | 0.76  | 0.73  | 0.75  | 0.78  | 0.50  |
|                                                                               | O1       | -0.82 | -0.81 | -0.69 | -0.86 | -0.61 |
|                                                                               | Spin     | 1     | 1     | 1     | 1     | 0     |
| $[\text{Cu}(\mu\text{-O})\text{Cu}]^{2+}/\text{Al6}'\text{-Al7}'/\text{MFI}$  | Cu1      | 0.68  | 0.61  | 0.74  | 0.68  | 0.72  |
|                                                                               | Cu2      | 0.75  | 0.59  | 0.30  | 0.43  | 0.44  |
|                                                                               | O1       | -0.82 | -0.80 | -0.69 | -0.85 | -0.65 |

|                                       |      |       |       |       |       |       |
|---------------------------------------|------|-------|-------|-------|-------|-------|
|                                       | Spin | 1     | 1     | 1     | 1     | 0     |
| 2[Cu( $\mu$ -O)Cu] <sup>2+</sup> /MFI | Cu1  | 0.65  | 0.56  | 0.46  | 0.52  | 0.48  |
|                                       | Cu2  | 0.58  | 0.68  | 0.49  | 0.49  | 0.45  |
|                                       | O1   | -0.78 | -0.80 | -0.68 | -0.81 | -0.75 |
|                                       | Cu3  | 0.43  | 0.46  | 0.58  | 0.60  | 0.57  |
|                                       | Cu4  | 0.50  | 0.35  | 0.51  | 0.53  | 0.48  |
|                                       | O6   | -0.47 | -0.38 | -0.73 | -0.68 | -0.64 |
|                                       | Spin | 1     | 1     | 1     | 1     | 0     |

**Table S7** Summarized Mulliken Charges of various Cu oxide cluster on Al1-Al1' and Al6-Al6' pair in MFI framework through direct methane to methanol process.

| Active sites                                  | Fragment | ISO   | ADS   | TS    | INT   | PROD  |
|-----------------------------------------------|----------|-------|-------|-------|-------|-------|
| [Cu( $\mu$ -O)Cu] <sup>2+</sup> @Al1-Al1'/MFI | Cu1      | 0.69  | 0.56  | 0.39  | 0.51  | 0.33  |
|                                               | Cu2      | 0.76  | 0.73  | 0.77  | 0.78  | 0.49  |
|                                               | O1       | -0.84 | -0.83 | -0.70 | -0.88 | -0.61 |
|                                               | Spin     | 1     | 1     | 1     | 1     | 0     |
| [Cu( $\mu$ -O)Cu] <sup>2+</sup> @Al6-Al6'/MFI | Cu1      | 0.69  | 0.62  | 0.75  | 0.69  | 0.73  |
|                                               | Cu2      | 0.76  | 0.60  | 0.30  | 0.43  | 0.44  |
|                                               | O1       | -0.83 | -0.81 | -0.68 | -0.86 | -0.66 |
|                                               | Spin     | 1     | 1     | 1     | 1     | 0     |
| 2[Cu( $\mu$ -O)Cu] <sup>2+</sup> /MFI         | Cu1      | 0.72  | 0.56  | 0.46  | 0.47  | 0.45  |
|                                               | Cu2      | 0.62  | 0.73  | 0.49  | 0.49  | 0.41  |
|                                               | O1       | -0.81 | -0.83 | -0.80 | -0.83 | -0.78 |
|                                               | Cu3      | 0.53  | 0.56  | 0.71  | 0.73  | 0.69  |
|                                               | Cu4      | 0.61  | 0.42  | 0.62  | 0.64  | 0.58  |
|                                               | O6       | -0.57 | -0.46 | -0.72 | -0.83 | -0.78 |
|                                               | Spin     | 1     | 1     | 1     | 1     | 0     |

**Table S8** Summarized Mulliken Charges of various Cu oxide cluster on Al1-Al1' and Al6-Al7 pair in MFI framework through direct methane to methanol process.

| Active sites                                  | Fragment | ISO   | ADS   | TS    | INT   | PROD  |
|-----------------------------------------------|----------|-------|-------|-------|-------|-------|
| [Cu( $\mu$ -O)Cu] <sup>2+</sup> @Al1-Al1'/MFI | Cu1      | 0.70  | 0.57  | 0.40  | 0.52  | 0.34  |
|                                               | Cu2      | 0.78  | 0.74  | 0.79  | 0.80  | 0.50  |
|                                               | O1       | -0.86 | -0.85 | -0.71 | -0.90 | -0.62 |
|                                               | Spin     | 1     | 1     | 1     | 1     | 0     |
| [Cu( $\mu$ -O)Cu] <sup>2+</sup> @Al6-Al7/MFI  | Cu1      | 0.70  | 0.63  | 0.77  | 0.70  | 0.74  |
|                                               | Cu2      | 0.78  | 0.61  | 0.31  | 0.44  | 0.45  |
|                                               | O1       | -0.85 | -0.83 | -0.69 | -0.88 | -0.67 |
|                                               | Spin     | 1     | 1     | 1     | 1     | 0     |
| 2[Cu( $\mu$ -O)Cu] <sup>2+</sup> /MFI         | Cu1      | 0.73  | 0.57  | 0.47  | 0.48  | 0.46  |
|                                               | Cu2      | 0.63  | 0.74  | 0.50  | 0.50  | 0.42  |
|                                               | O1       | -0.83 | -0.85 | -0.82 | -0.85 | -0.80 |
|                                               | Cu3      | 0.54  | 0.57  | 0.72  | 0.74  | 0.70  |
|                                               | Cu4      | 0.62  | 0.43  | 0.63  | 0.65  | 0.59  |
|                                               | O6       | -0.58 | -0.47 | -0.80 | -0.85 | -0.80 |
|                                               | Spin     | 1     | 1     | 1     | 1     | 0     |

**Table S9** The activation energy and desorption energy reported by DFT calculation of the direct conversion of methane to methanol on various Cu oxide species and number of active site on MFI frameworks

| Active site                                         | Cu active site | Al site(s)                | Computational method <sup>a</sup> | C-H cleavage mechanism | C-H activation barrier (kcal mol <sup>-1</sup> ) | MeOH desorption energy (kcal mol <sup>-1</sup> ) | Ref.      |
|-----------------------------------------------------|----------------|---------------------------|-----------------------------------|------------------------|--------------------------------------------------|--------------------------------------------------|-----------|
| [CuO <sup>+</sup> ]                                 | Single         | 10-MR(T1)                 | P/PBE-D2                          | Heterolytic            | 7.2                                              | 42.2                                             | 28        |
| [Cu <sup>2</sup> (μ-O)] <sup>2+</sup>               | Single         | 10-MR                     | C/B3LYP                           | Homolytic              | 18.5                                             | -                                                | 11        |
|                                                     | Single         | 8-MR(T7/T12)              | P/PEB                             | Homolytic              | 22.2                                             | 37.3                                             | 26        |
|                                                     | Single         | 10-MR                     | C/PBE                             | Homolytic              | 10.4                                             | 34.6                                             | 39        |
|                                                     | Single         | 10-MR(T1/T1)              | P/PBE-D2                          | Homolytic              | 17.0                                             | 50.8                                             | 27        |
|                                                     | Single         | 10-MR(T3/T3)              | P/PBE-D2                          | Homolytic              | 14.8                                             | 52.6                                             | 40        |
| [Cu <sub>2</sub> (μ-O) <sub>2</sub> ] <sup>2+</sup> | Single         | 10-MR(T3/T3)              | P/PBE-D2                          | Homolytic              | 12.0                                             | 19.8                                             | 40        |
| [Cu <sub>3</sub> (μ-O) <sub>3</sub> ] <sup>2+</sup> | Single         | 8-MR(T7/T12)              | P/PBE                             | Homolytic              | 12.9                                             | 20.6                                             | 26        |
| [Cu(μ-O)Cu] <sup>2+</sup>                           | Single         | 10-MR(T1'/T12')           | C/M06-2X                          | Homolytic              | 22.9                                             | 75.9                                             | this work |
| [Cu(μ-O)Cu] <sup>2+</sup>                           | Single         | 10-MR(T6/T7)              | C/M06-2X                          | Homolytic              | 19.5                                             | 74.6                                             | this work |
| 2[Cu(μ-O)Cu] <sup>2+</sup>                          | double         | 10-MR<br>(T1'/T12',T6/T7) | C/M06-2X                          | Homolytic              | 12.5                                             | 85.6                                             | this work |
| 2[Cu(μ-1,2-peroxo)Cu] <sup>2+</sup>                 | double         | 10-MR<br>(T1'/T12',T6/T7) | C/M06-2X                          | Homolytic              | 30.3                                             | 23.0                                             | this work |
| [Cu <sub>2</sub> O] <sup>2+</sup>                   | Single         | -                         | C/B3LYP                           | Homolytic              | 15.7                                             | -                                                | 11        |
| Experiment                                          |                |                           |                                   |                        |                                                  |                                                  |           |

<sup>a</sup> C and P stand for cluster model and periodic structure, respectively.
